# Supplementary material
Source: PubMed Central journal article supplement (PMC2981434)
Supplement: NIHMS244551-supplement-1_si_001.pdf [file NIHMS244551-supplement-1_si_001.pdf]

## **Supplementary information**

### **Cationic porphycenes as potential photosensitizers for antimicrobial photodynamic therapy**

Xavier Ragàs,<sup>†,‡</sup> David Sánchez-García,<sup>†</sup> Rubén Ruiz-González,<sup>†</sup> Tianhong Dai,<sup>‡,⊥</sup>  
Montserrat Agut,<sup>†</sup> Michael R. Hamblin,<sup>‡,⊥,#</sup> and Santi Nonell<sup>\*,†</sup>

<sup>†</sup>*Institut Químic de Sarrià, Universitat Ramon Llull, Barcelona 08017, Spain; <sup>‡</sup>Wellman Center for Photomedicine, Massachusetts General Hospital, Boston, Massachusetts 02114, USA;*

<sup>⊥</sup>*Department of Dermatology, Harvard Medical School, Boston, Massachusetts 02115, USA;*

<sup>#</sup>*Harvard-MIT Division of Health Sciences and Technology, Cambridge, Massachusetts 02139, USA*

**Part I. NMR Spectra**

**Part II. HPLC Analysis of Py<sub>3</sub>MeO-TBPO**

**Part III. Fluorescence quantum yields**

**Part IV. Singlet oxygen quantum yields**

**Part V. *In vitro* photoinactivation of bacteria**

**Part VI. *In vitro* photoinactivation of fungi**

## Part I. NMR spectra

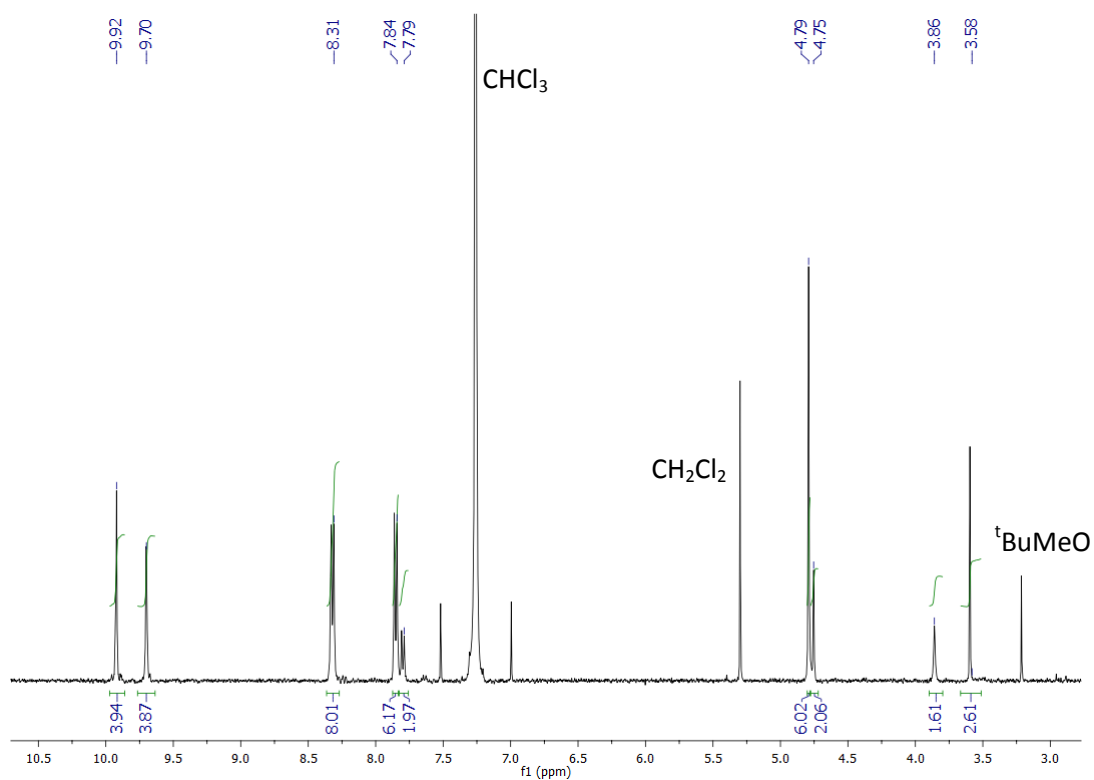

Fig. S1.  $^1\text{H-NMR}$  spectrum of  $\text{Br}_3\text{MeO-TBPo}$  in  $\text{CDCl}_3$ .

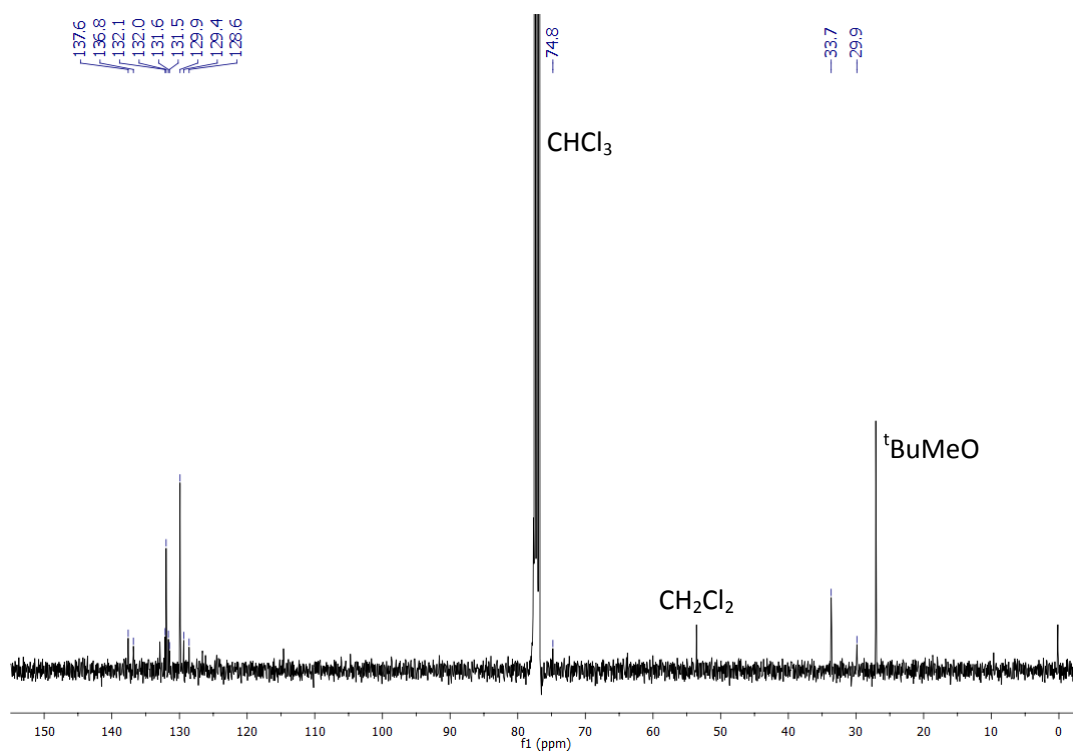

Fig. S2.  $^{13}\text{C-NMR}$  spectrum of  $\text{Br}_3\text{MeO-TBPo}$  in  $\text{CDCl}_3$ .

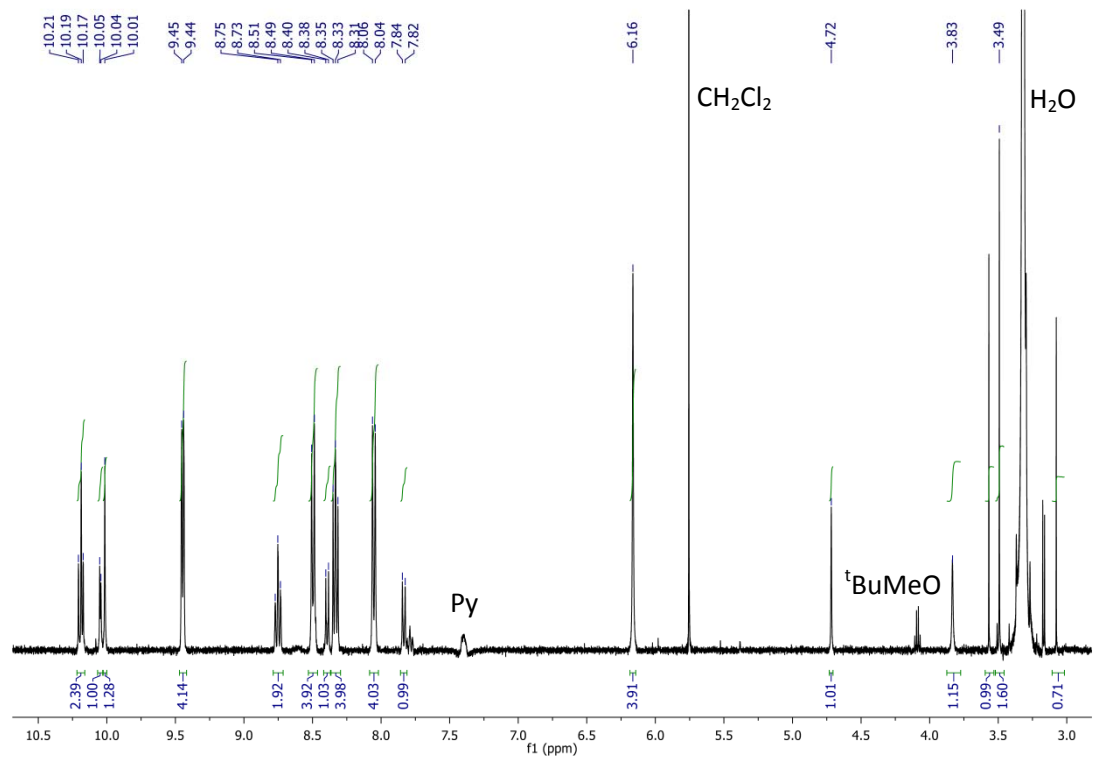

**Fig. S3.**  $^1\text{H-NMR}$  spectrum of  $\text{Py}_3\text{MeO-TBPO}$  in  $\text{d}_6\text{-DMSO}$ .

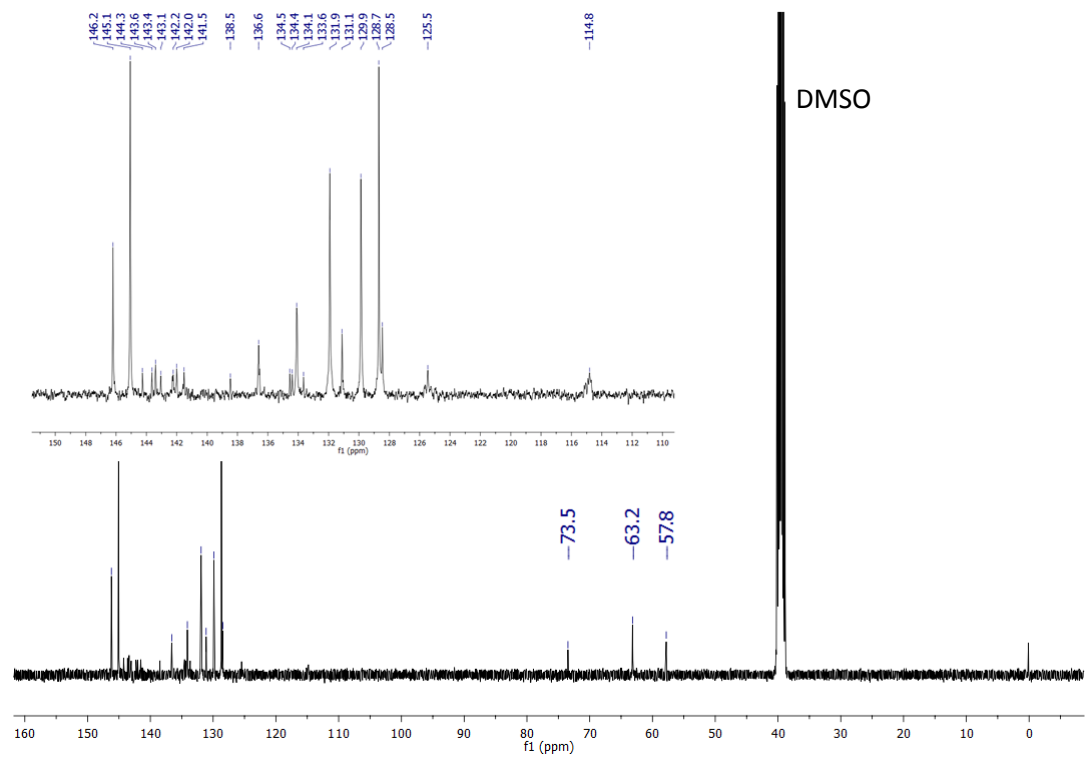

**Fig. S4.**  $^{13}\text{C-NMR}$  spectrum of  $\text{Py}_3\text{MeO-TBPO}$  in  $\text{d}_6\text{-DMSO}$ . Inset: Zoom from 110 to 150 ppm.

## Part II. HPLC analysis of Py<sub>3</sub>MeO-TBPO

Liquid Chromatography (HPLC) was performed with an Agilent 1200 series liquid chromatograph equipped with a diode array detector. Py<sub>3</sub>MeO-TBPO was analyzed on a 30 mm x 4 mm, 3  $\mu$ m particle, Lichrocart Purospher STAR RP-18E column. Detection was achieved at three wavelengths, 244, 380 and 650 nm. All chromatography runs were performed at 50 °C with a mobile phase flow rate of 2.0 mL min<sup>-1</sup>. Isocratic elution was performed with 50:50 ACN/aqueous solution, which contained 25 mM sodium dodecyl sulfate and KH<sub>2</sub>PO<sub>4</sub> 0.01M, adjusted to pH = 4.

As shown in Figure S5, a single peak can be observed at 8.6 min, irrespective of the detection wavelength.

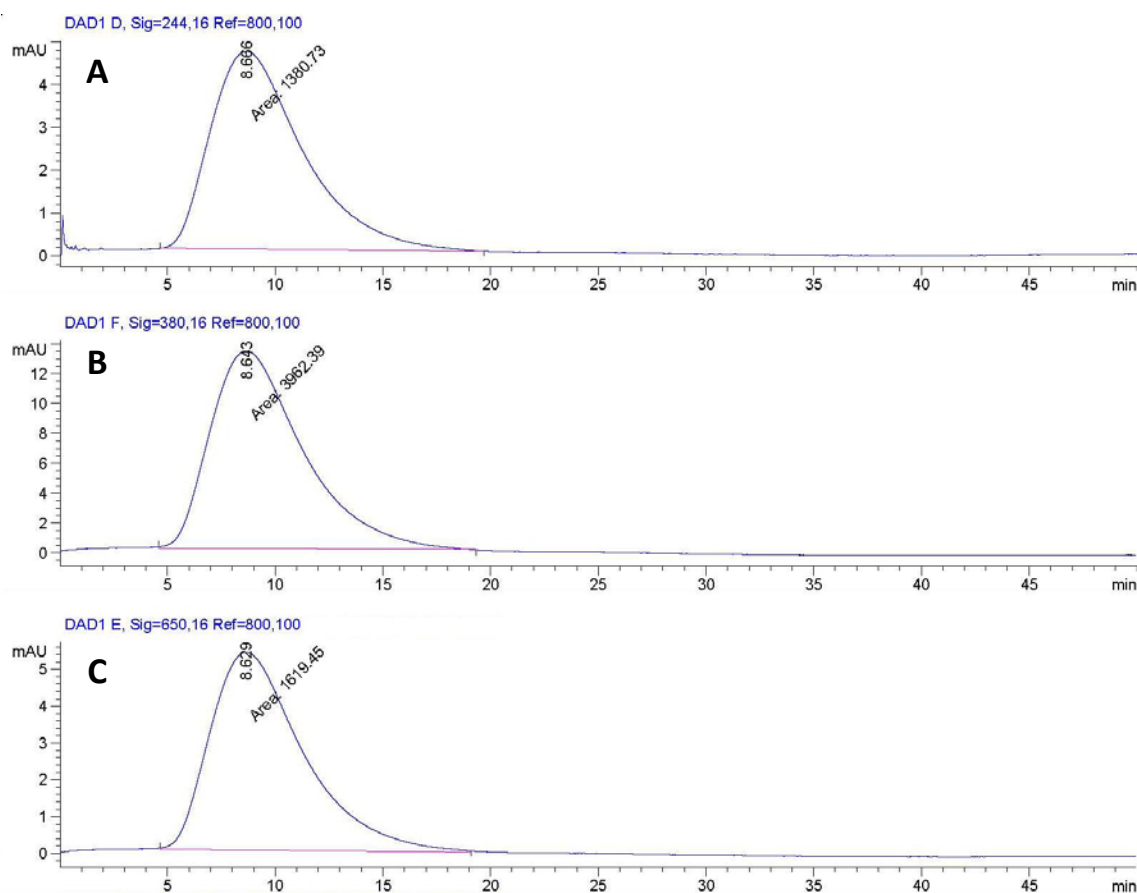

**Figure S5.** Liquid chromatography of Py<sub>3</sub>MeO-TBPO detected at (A) 244 nm, (B) 380 nm and (C) 650 nm.

UV-Vis spectra were recorded every 1 s and found to be identical throughout the peak (Figure S6).

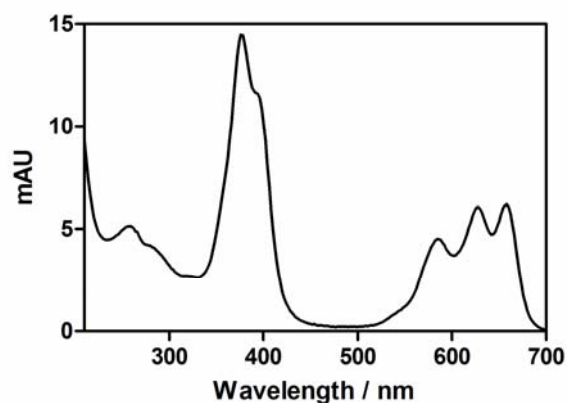

**Figure S6.** Absorption spectrum of the Py<sub>3</sub>MeO-TBPO peak at 8.6 min obtained by liquid chromatography and diode array detection.

### Part III. Fluorescence quantum yields

The fluorescence quantum yield,  $\Phi_F$ , was determined by means of equation 1:

$$\Phi_F(\text{sample}) = \frac{\overline{F}_{\text{sample}} \cdot n_{\text{sample}}^2}{\overline{F}_{\text{ref}} \cdot n_{\text{ref}}^2} \cdot \Phi_F(\text{ref}) \quad \text{Equation 1}$$

where  $F_i$  is the fluorescence intensity integrated over the entire emission spectrum corrected by the absorption factor ( $1 \cdot 10^{-A}$ ) and  $n_i$  is the refractive index of the solvent used in each case.

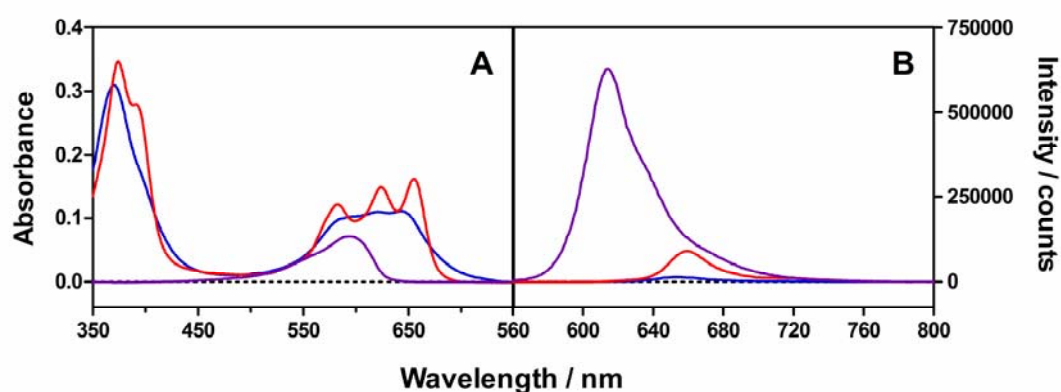

**Fig. S7.** (A) Absorption and (B) fluorescence spectra of cresyl violet in MeOH (violet), and Py<sub>3</sub>MeO-TBPO in water (blue) and in MeOH (red).

The absorption and emission spectra of optically-matched solutions at 532 nm of cresyl violet in MeOH as reference, and porphycene solutions in MeOH and aqueous media is shown in Figure S1.

#### Part IV. Singlet oxygen quantum yields

The quantum yield of singlet oxygen photosensitisation is defined as the number of photosensitized  $^1\text{O}_2$  molecules per absorbed photon. The pre-exponential factor  $S(0)$ , which is proportional to  $\Phi_\Delta$ , was determined by fitting equation 2 to the time-resolved phosphorescence intensity at 1270 nm.

$$S(t) = S(0) \cdot \frac{\tau_\Delta}{\tau_T - \tau_\Delta} \cdot \left( e^{-t/\tau_T} - e^{-t/\tau_\Delta} \right) \quad \text{Equation 2}$$

The quantum yields of  $^1\text{O}_2$  production were determined by comparison of  $S(0)$  to that produced by an optically matched reference in the same solvent and at the same excitation wavelength and intensity (Equation 3).

$$\Phi_\Delta (\text{sample}) = \frac{S(0)_{\text{sample}}}{S(0)_{\text{ref}}} \cdot \Phi_\Delta (\text{ref}) \quad \text{Equation 3}$$

Part V. *In vitro* photodynamic inactivation of bacteria

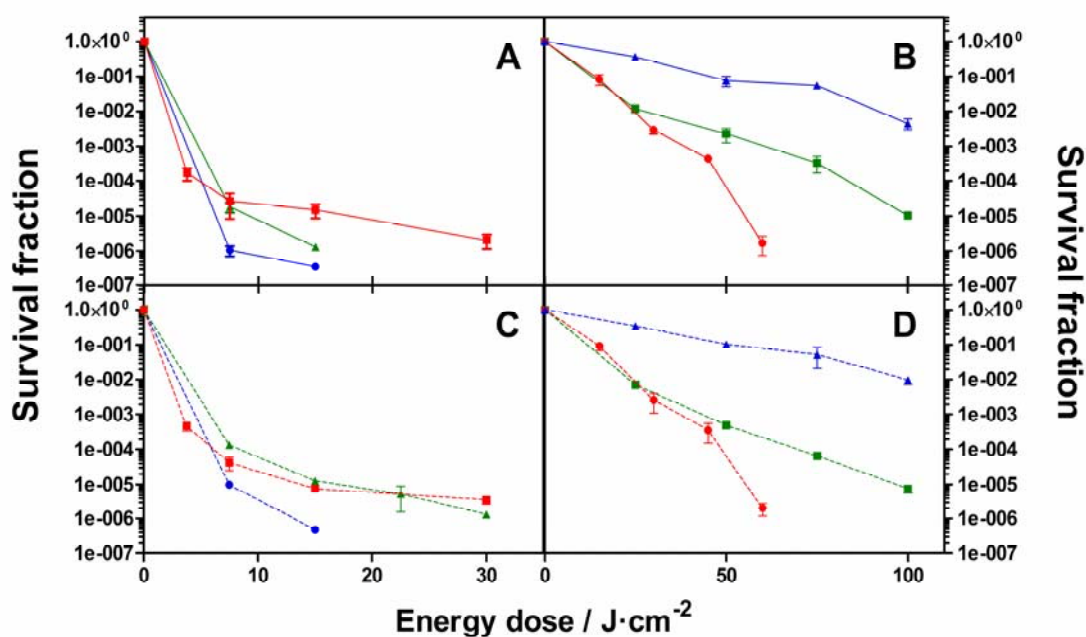

**Figure S8.** Light-dose response inactivation curves of bacteria upon irradiation with light of 652-nm at 125 mW·cm<sup>-2</sup>. (A, C) Survival curves of MRSA (triangles), *S. aureus* (circles), *E. faecalis* (squares) with (dashed line) and without (solid line) removing the excess of PS from the solution with a bulk concentration of Py<sub>3</sub>MeO-TBPO of 0.5 μM (*E. faecalis*) and 1 μM (MRSA and *S. aureus*). (B, D) Survival curves of *A. baumannii* (squares), *E. coli* (circles), *P. mirabilis* (triangles) with (dashed line) and without (solid line) removing the excess of PS from the solution with a bulk concentration of 5 μM (*A. baumannii* and *E. coli*) and 20 μM (*P. mirabilis*). Error bars show the standard error of the mean of 3 different experiments.

Part VI. *In vitro* photodynamic inactivation of fungi

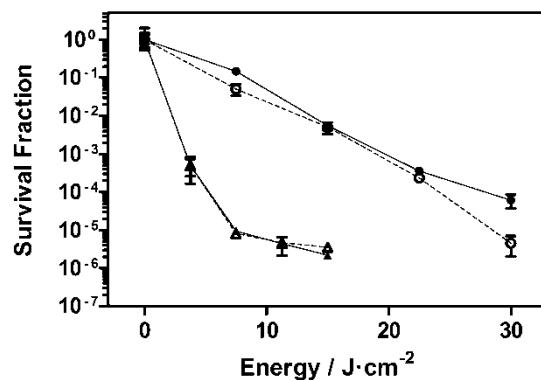

**Figure S9.** Light-dose response inactivation curves of *C. albicans* (circles) with light of 652-nm and *C. krusei* (triangles) with light of 635-nm. Survival curves with (dashed line) and without (solid line) removing the excess of PS from the solution with a bulk concentration of Py<sub>3</sub>MeO-TBPO of 20  $\mu$ M for *C. albicans* and 10  $\mu$ M for *C. krusei*. Error bars show the standard error of the mean of 3 different experiments.
